# Supplementary material for: Post COVID-19 in children, adolescents, and adults: results of a matched cohort study including more than 150,000 individuals with COVID-19
Source: bioRxiv or medRxiv preprint supplement (doi:10.1101/2021.10.21.21265133), 2021-10-22
Supplement: Supplementary file [file media-1.pdf]

## Supplementary material

### Post COVID-19 in children, adolescents, and adults: results of a matched cohort study including more than 150,000 individuals with COVID-19

Martin Roessler<sup>a</sup>, Falko Tesch<sup>a</sup>, Manuel Batram<sup>b</sup>, Josephine Jacob<sup>c</sup>, Friedrich Loser<sup>d</sup>, Oliver Weidinger<sup>e</sup>, Danny Wende<sup>f</sup>, Annika Vivirito<sup>c</sup>, Nicole Toepfner<sup>g</sup>, Martin Seifert<sup>a</sup>, Oliver Nagel<sup>c</sup>, Christina König<sup>d</sup>, Roland Jucknewitz<sup>e</sup>, Jakob Peter Armann<sup>g</sup>, Reinhard Berner<sup>g</sup>, Marina Treskova-Schwarzbach<sup>h</sup>, Dagmar Hertle<sup>f</sup>, Stefan Scholz<sup>h</sup>, Stefan Stern<sup>e</sup>, Pedro Ballesteros<sup>f</sup>, Stefan Baßler<sup>i</sup>, Barbara Bertele<sup>d</sup>, Uwe Repschläger<sup>f</sup>, Nico Richter<sup>j</sup>, Cordula Riederer<sup>j</sup>, Franziska Sobik<sup>j</sup>, Anja Schramm<sup>e</sup>, Claudia Schulte<sup>f</sup>, Lothar Wieler<sup>h</sup>, Jochen Walker<sup>c</sup>, Christa Scheidt-Nave<sup>h</sup>, Jochen Schmitt<sup>a</sup>

<sup>a</sup>Center for Evidence-Based Healthcare (ZEGV), University Hospital Carl Gustav Carus and Carl Gustav Carus Faculty of Medicine, TU Dresden, Dresden, Germany

<sup>b</sup>Vandage GmbH, Bielefeld, Germany and Faculty for Business Administration and Economics, Bielefeld University, Bielefeld, Germany

<sup>c</sup>InGef - Institute for Applied Health Research Berlin, Berlin, Germany

<sup>d</sup>Techniker Krankenkasse, Hamburg, Germany

<sup>e</sup>AOK Bayern - Die Gesundheitskasse, Regensburg, Germany

<sup>f</sup>BARMER Institut für Gesundheitssystemforschung (bifg), Berlin, Germany

<sup>g</sup>Department of Pediatrics, University Hospital Carl Gustav Carus and Carl Gustav Carus Faculty of Medicine, TU Dresden, Dresden, Germany

<sup>h</sup>Robert Koch-Institut, Berlin, Germany

<sup>i</sup>AOK PLUS, Dresden, Germany

<sup>j</sup>DAK-Gesundheit, Hamburg, Germany

Corresponding author: Martin Roessler, Center for Evidence-Based Healthcare (ZEGV), University Hospital Carl Gustav Carus and Carl Gustav Carus Faculty of Medicine, TU Dresden, Fetscherstr. 74, 01307 Dresden, Germany. email: correspondence.zegv@ukdd.de

## S1 Outcomes by domain and diagnosis/symptom complex

### Outcomes by domain

**Mental health outcomes:** Adjustment disorder; Anxiety disorder; Behavioral symptoms; Cognitive function impairment; Concentration impairment/Concentration deficit; Depression; Disorientation; Emotional and behavioral disorder; Mood disorder; Obsessive-compulsive disorder; Somatization disorder

**Overlap (physical/mental) outcomes:** Abdominal pain; Acute pain; Cachexia; Changes in bowel habits; Chronic fatigue syndrome; Developmental delay; Dysuria; Eye pain; General symptoms; Headache; Hyperhidrosis; Joint pain; Loss of appetite, weight gain/loss, eating disorders; Malaise/fatigue/exhaustion; Memory impairment; Myalgia; Neurasthenia; Other coordination disorders/ataxia; Pain, not elsewhere classified; Paresthesia of skin; Post-COVID; Sensation and perception disorder; Sleep disorders; Somnolence, sopor, coma; Throat/chest pain

**Physical health outcomes:** Anuria, oliguria; Arthritides; Ascites; Carditis due to viruses; Cough; Covid toe; Diarrhea; Dysgeusia; Dyslexia; Dysmenorrhea; Dysphagia; Dyspnea; Epistaxis; Facial nerve paralysis; Fever; Flatulence; Gangraen; Hair loss; Hearing loss/tinnitus; Heart failure; Heart murmurs; Heartburn; Hemorrhage; Hepatomegaly and splenomegaly; Hoarseness; Hypotension; Impaired balance; Lymphadenopathy; Meningismus; Movement disorders; Multisystemic inflammatory

syndrome; Myocardial infarction; Myocarditis; Nausea; Neurological manifestation of Post-COVID; Oedema; Other cardiac arrhythmias; Other symptoms of the urinary system; Paresis; Pathological findings from male genital tract; Pathological lung findings; Pathological reflexes; Pericarditis; Polyuria; Pulmonary embolism; Rash; Respiratory insufficiency; Seizures; Shock; Sinus vein thrombosis; Speech and language disorders; Stroke; Subcutaneous nodules; Syncope; Tachycardia/Palpitation; Tetany; Thrombosis; Urethral discharge; Urinary retention; Vertigo; Visual disturbances

### **Outcomes by diagnosis/symptom complex**

**Cardiac diagnosis/symptom complex:** Carditis due to viruses; Heart failure; Heart murmurs; Hypotension; Myocardial infarction; Myocarditis; Other cardiac arrhythmias; Pericarditis; Shock; Syncope; Tachycardia/Palpitation; Throat/chest pain

**Dermatological diagnosis/symptom complex:** Hair loss; Rash; Subcutaneous nodules

**ENT diagnosis/symptom complex:** Dysgeusia; Dysphagia; Epistaxis; Hearing loss/tinnitus; Hoarseness; Vertigo

**Gastrointestinal diagnosis/symptom complex:** Abdominal pain; Ascites; Changes in bowel habits; Diarrhea; Dysphagia; Flatulence; Heartburn; Hepatomegaly and splenomegaly; Nausea

**Gynecological/urogenital diagnosis/symptom complex:** Dysmenorrhea; Pathological findings from male genital tract; Urethral discharge

**Mental diagnosis/symptom complex:** Adjustment disorder; Anxiety disorder; Behavioral symptoms; Chronic fatigue syndrome; Cognitive function impairment; Concentration impairment/Concentration deficit; Depression; Disorientation; Emotional and behavioral disorder; Malaise/fatigue/exhaustion; Memory impairment; Mood disorder; Neurasthenia; Obsessive-compulsive disorder; Other coordination disorders/ataxia; Paresthesia of skin; Sensation and perception disorder; Sleep disorders; Somatization disorder; Somnolence, sopor, coma

**Multifactorial symptoms:** Acute pain; Cachexia; Fever; General symptoms; Hyperhidrosis; Loss of appetite, weight gain/loss, eating disorders; Lymphadenopathy; Oedema; Pain, not elsewhere classified

**Musculoskeletal system diagnosis/symptom complex:** Arthritides; Impaired balance; Joint pain; Movement disorders; Myalgia

**Nephrological diagnosis/symptom complex:** Anuria, oliguria; Dysuria; Other symptoms of the urinary system; Polyuria; Urinary retention

**Neurological diagnosis/symptom complex:** Chronic fatigue syndrome; Developmental delay; Dysgeusia; Dyslexia; Dysphagia; Facial nerve paralysis; Impaired balance; Meningismus; Movement disorders; Neurasthenia; Neurological manifestation of Post-COVID; Other coordination disorders/ataxia; Paresis; Paresthesia of skin; Pathological reflexes; Seizures; Sensation and perception disorder; Sinus vein thrombosis; Sleep disorders; Somnolence, sopor, coma; Speech and language disorders; Stroke; Tetany; Urinary retention; Vertigo; Visual disturbances

**Pain diagnosis/symptom complex:** Abdominal pain; Acute pain; Dysuria; Eye pain; Headache; Joint pain; Myalgia; Pain, not elsewhere classified; Throat/chest pain

**Pulmonary diagnosis/symptom complex:** Cough; Dyspnea; Pathological lung findings; Pulmonary embolism; Respiratory insufficiency

**Vascular/coagulation diagnosis/symptom complex:** Covid toe; Epistaxis; Gangraen; Hemorrhage; Myocardial infarction; Pulmonary embolism; Sinus vein thrombosis; Stroke; Thrombosis

**S2 Covariates**

**Covariates for children and adolescents**

Asthma; Bronchopulmonary dysplasia; Cancer; Congenital heart disease; Diabetes: type I with insulin; Dialysis; Down syndrome; Epilepsy; Immunosuppressive disease; Immunosuppressive therapy; Obesity; Primary immunodeficiency; Psychomotor deficit

**Covariates for adults**

Asthma; Autoimmune disease; Cardiac arrhythmia; Cerebrovascular disease; Chronic kidney disease; COPD or severe lung disease; Coronary heart disease; Crohn’s disease; Dementia; Depression; Diabetes (without insulin); Diabetes: type I with insulin; Diabetes: other with insulin; Dialysis; Down syndrome; Heart failure; Hemato-oncological disease with therapy; Hemato-oncological disease without therapy; Hepatitis; HIV; Hypertension; Immunosuppressive disease; Immunosuppressive therapy; Intellectual disabilities; Interstitial lung disease; Mental illness; Metastatic cancer with therapy; Metastatic cancer without therapy; Obesity; Organ transplant; Other neurological diseases; Primary immunodeficiency; Rheumatological symptoms/diagnosis; Severe lung disease; Severe or cirrhotic liver disease; Solid cancer with therapy; Solid cancer without therapy; Ulcerative colitis

**S3 Results for age groups 0-11 and 12-17**

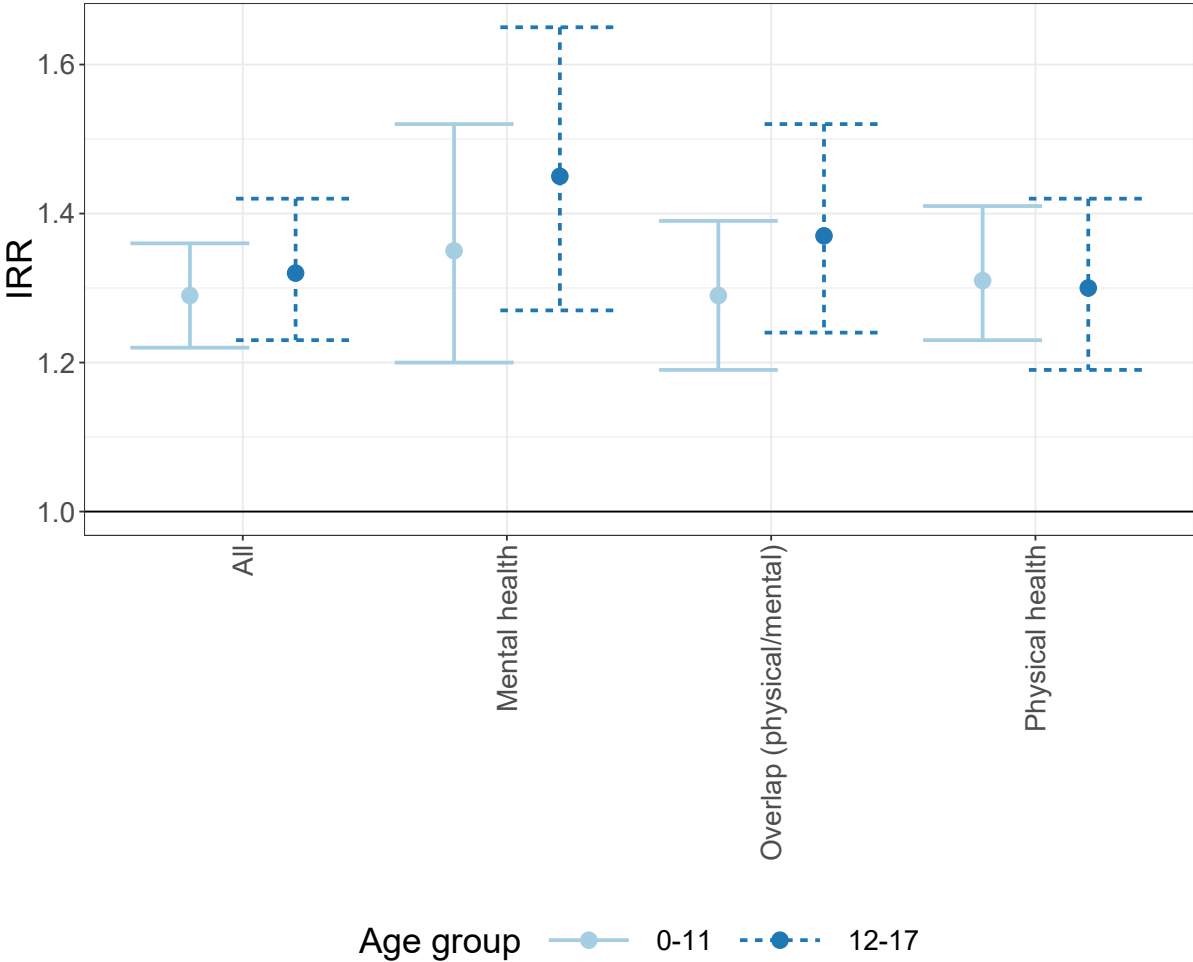

Figure S1: Estimated incidence rate ratios with 95%-confidence intervals in age groups 0-11 and 12-17 by domain

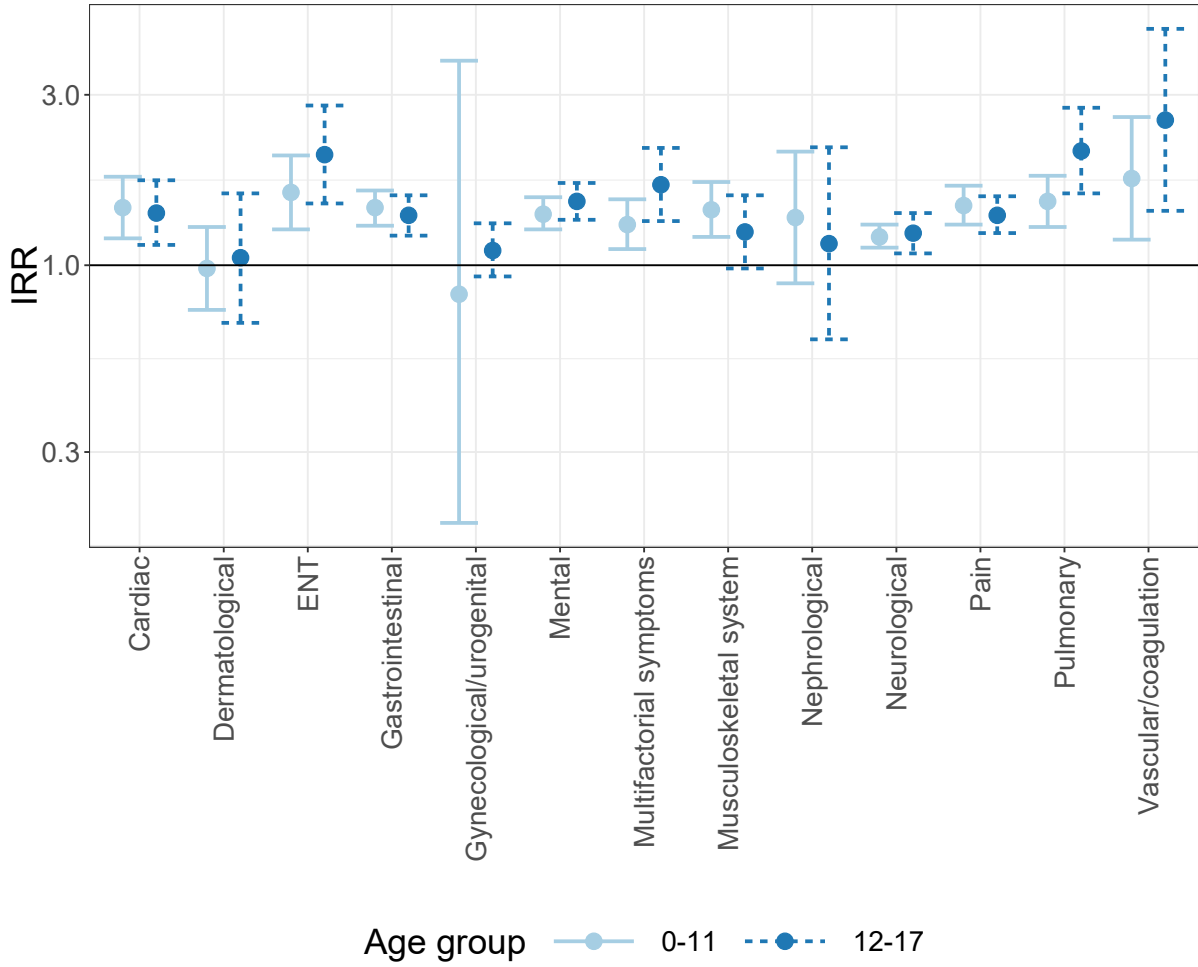

Figure S2: Estimated incidence rate ratios with 95%-confidence intervals in age groups 0-11 and 12-17 by diagnosis/symptom complex
